# Supplementary material
Source: publisher figshare collection journal article supplement (https://tandf.figshare.com/articles/dataset/_/5144275)
Supplement: Supplementary file 2 [file 2]

Archive with 3 entries (3 files):
- fmri_slice_zscores.csv
- gfl_supplementary.pdf
- supplementary.pdf
