# Supplementary material
Source: publisher figshare collection journal article supplement (https://tandf.figshare.com/articles/dataset/_/5144275)
Supplement: Supplementary file 2 [file 2 › fmri_slice_zscores.csv]

V1	V2	V3	V4	V5	V6	V7	V8	V9	V10	V11	V12	V13	V14	V15	V16	V17	V18	V19	V20	V21	V22	V23	V24	V25	V26	V27	V28	V29	V30	V31	V32	V33	V34	V35	V36	V37	V38	V39	V40	V41	V42	V43	V44	V45	V46	V47	V48	V49	V50
0	0	0	0	0	0	0	0	0	0	0	0	0	0	0	0	0	0	0	0	0	0	0	0	0	0	0	0	0	0	0	0	0	0	0	0	0	0	0	0	0	0	0	0	0	0	0	0	0	0
0	0	0	0	0	0	0	0	0	0	0	0	0	0	0	0	0	0	0	0	0	0	0	0	0	0	0	0	0	0	0	0	0	0	0	0	0	0	0	0	0	0	0	0	0	0	0	0	0	0
0	0	0	0	0	0	0	0	0	0	0	0	0	0	0	0	0	0	0	0	0	0	0	0	0	0	0	0	0	0	0	0	0	0	0	0	0	0	0	0	0	0	0	0	0	0	0	0	0	0
0	0	0	0	0	0	0	0	0	0	0	0	0	0	0	0	0	0	0	0	0	0	0	0	0	0	0	0	0	0	0	0	0	0	0	0	0	0	0	0	0	0	0	0	0	0	0	0	0	0
0	0	0	0	0	0	0	0	0	0	0	0	0	0	0	0	0	0	0	0	0	0	0	0	0	0	0	0	0	0	0	0	0	0	0	0	0	0	0	0	0	0	0	0	0	0	0	0	0	0
0	0	0	0	0	0	0	0	0	0	0	0	0	0	0	0	0	0	0	0	0	0	0	0	0	0	0	0	0	0	0	0	0	0	0	0	0	0	0	0	0	0	0	0	0	0	0	0	0	0
0	0	0	0	0	0	0	0	0	0	0	0	0	0	0	0	0	0	0	0	0	0	0	0	0	0	0	0	0	0	0	0	0	0	0	0	0	0	0	0	0	0	0	0	0	0	0	0	0	0
0	0	0	0	0	0	0	0	0	0	0	0	0	0	0	0	0	0	0	0	0	0	0	0	0	0	0	0	0	0	0	0	0	0	0	0	0	0	0	0	0	0	0	0	0	0	0	0	0	0
0	0	0	0	0	0	0	0	0	0	0	0	0	0	0	0	0	0	0	0	0	0	0	0	0	0	0	0	0	0	0	0	0	0	0	0	0	0	0	0	0	0	0	0	0	0	0	0	0	0
0	0	0	0	0	0	0	0	0	0	0	0	0	0	0	0	0	0	0	0	0	0	0	0	0	0	0	0	0	0	0	0	0	0	0	0	0	0	0	0	0	0	0	0	0	0	0	0	0	0
0	0	0	0	0	0	0	0	0	0	0	0	0	0	0	0	0	0	0	0	0	0	0	0	0	0	0	0	0	0	0	0	0	0	0	0	0	0	0	0	0	0	0	0	0	0	0	0	0	0
0	0	0	0	0	0	0	0	0	0	0	0	0	0	0	0	0	0	0	0	0	0	0	0	0	0	0	0	0	0	0	0	0	0	0	0	0	0	0	0	0	0	0	0	0	0	0	0	0	0
0	0	0	0	0	0	0	0	0	0	0	0	0	0	0	0	0	0	0	0	0	0	0	0	0	0	0	0	0	0	0	0	0	0	0	0	0	0	0	0	0	0	0	0	0	0	0	0	0	0
0	0	0	0	0	0	0	0	0	0	0	0	0	0	0	0	0	0	0	0	0	0	0	0	0	0	0	0	0	0	0	0	0	0	0	0	0	0	0	0	0	0	0	0	0	0	0	0	0	0
0	0	0	0	0	0	0	0	0	0	0	0	0	0	0	0	0	0	0	0	0	0	0	0	0	0	0	0	0	0	0	0	0	0	0	0	0	0	0	0	0	0	0	0	0	0	0	0	0	0
0	0	0	0	0	0	0	0	0	0	0	0	0	0	0	0	0	0	0	0	0	0	0	0	0	0	0	0	0	0	0	0	0	0	0	0	0	0	0	0	0	0	0	0	0	0	0	0	0	0
0	0	0	0	0	0	0	0	0	0	0	0	0	0	0	0	0	0	0	0	0	0	0	0	0	0	0	0	0	0	0	0	0	0	0	0	0	0	0	0	0	0	0	0	0	0	0	0	0	0
0	0	0	0	0	0	0	0	0	0	0	0	0	0	0	0	0	0	0	0	0	0	0	0	0	0	0	0	0	0	0	0	0	0	0	0	0	0	0	0	0	0	0	0	0	0	0	0	0	0
0	0	0	0	0	0	0	0	0	0	0	0	0	0	0	0	0	0	0	0	0	0	0	0	0	0	0	0	0	0	0	0	0	0	0	0	0	0	0	0	0	0	0	0	0	0	0	0	0	0
0	0	0	0	0	0	0	0	0	0	0	0	0	0	0	0	0	0	0	0	0	0	0	0	0	0	0	0	0	0	0	0	0	0	0	0	0	0	0	0	0	0	0	0	0	0	0	0	0	0
0	0	0	0	0	0	0	0	0	0	0	0	0	0	0	0	0	0	0	0	0	0	0	0	0	0	0	0	0	0	0	0	0	0	0	0	0	0	0	0	0	0	0	0	0	0	0	0	0	0
0	0	0	0	0	0	0	0	0	0	0	0	0	0	0	0	0	0	0	0	0	0	0	0	0	0	0	0	0	0	0	0	0	0	0	0	0	0	0	0	0	0	0	0	0	0	0	0	0	0
0	0	0	0	0	0	0	0	0	0	0	0	0	0	0	0	0	0	0	0	0	0	0	0	0	0	0	0	0	0	0	0	0	0	0	0	0	0	0	0	0	0	0	0	0	0	0	0	0	0
0	0	0	0	0	0	0	0	0	0	0	0	0	0	0	0	0	0	0	0	0	0	0	0	0	0	0	0	0	0	0	0	0	0	0	0	0	0	0	0	0	0	0	0	0	0	0	0	0	0
0	0	0	0	0	0	0	0	0	0	0	0	0	0	0	0	0	0	0	0	0	0	0	0	0	0	0	0	0	0	0	0	0	0	0	0	0	0	0	0	0	0	0	0	0	0	0	0	0	0
0	0	0	0	0	0	0	0	0	0	0	0	0	0	0	0	0	0	0	0	0	0	0	0	0	0	0	0	0	0	0	0	0	0	0	0	0	0	0	0	-0.453175455331802	0	0	0	0	0	0	0	0	0
0	0	0	0	0	0	0	0	0	0	0	0	0	0	0	0	0	0	0	0	0	0	0	0	0	0	0	0	0	0	0	0	0	0	0	0	0	-0.0159479398280382	0.00973353907465935	1.03391575813293	0	0	0	0	0	0	0	-0.935992121696472	-1.1930330991745	-0.70604544878006
0	0	0	0	0	0	0	0	0	0	0	0	0	0	0	0	0	0	0	0	0	0	0	0	0	0	0	0	0	0	0	0	0	0	-0.571029305458069	-0.37019270658493	-0.299926161766052	-0.781076550483704	0.318155705928802	0.597193360328674	-0.490545123815536	-0.485301852226257	-0.278562098741531	-1.13262736797333	-0.180770263075829	0.631918847560883	0.0721080899238586	-1.85697710514069	-0.695807993412018	-0.678334057331085
0	0	0	0	0	0	0	0	0	0	0	0	0	0	0	0	0	0	0	0	0	0	0	0	0	0	0	0	0	0	0	0	0	0	-2.01308608055115	-0.00358143984340131	1.03614437580109	0.10199349373579	0.603237330913544	-0.143085792660713	0.370144814252853	0.550928294658661	0.24361851811409	-1.81010270118713	-1.87996077537537	-0.33893820643425	-1.50755822658539	-1.37033104896545	-0.219270437955856	-2.40050649642944
0	0	0	0	0	0	0	0	0	0	0	0	0	0	0	0	0	0	0	0	0	0	0	0	0	0	0	0	0	0	0	-0.386663466691971	0	0	0	-0.218311503529549	0.757811009883881	0.655622482299805	0.646046161651611	0.300934791564941	0.5056112408638	1.33323907852173	2.56831526756287	0.0212109871208668	-3.03360676765442	-1.00807666778564	-0.145612299442291	0	0	-0.434204518795013
0	0	0	0	0	0	0	0	0	0	0	0	0	0	0	0	0	0	0	0	0	0	0	0	0	0	0	-0.853737115859985	-0.216012611985207	0	0.237462058663368	0.0556515753269196	0	0	-0.20645397901535	0.566765904426575	0.566518664360046	1.14708948135376	2.21794247627258	0.645957946777344	-0.0198599714785814	-0.319088190793991	0.35748165845871	2.02016806602478	-1.23331522941589	0.514019310474396	-1.25374186038971	-0.689141154289246	-0.0577119961380959	-0.715659737586975
0	0	0	0	0	0	0	0	0	0	0	0	0	0	0	0	0	0	0	0	0	0	0	0	0	0.251347601413727	-0.135536894202232	0.0798833295702934	0.192584469914436	-1.79083693027496	0.0311274118721485	1.18696618080139	0.361042261123657	0.272450566291809	0	0	0	-0.161878526210785	-1.57073748111725	-2.56933331489563	-2.28359365463257	-2.67009925842285	-2.67967176437378	-0.265427827835083	-1.85538518428802	-2.25119161605835	-2.18311309814453	-1.32764601707458	-0.444437652826309	-0.888943195343018
0	0	0	0	0	0	0	0	0	0	0	0	0	0	0	0	0	0	0	0	0	0	-0.0652534142136574	-1.20838475227356	-0.123228318989277	1.79110872745514	1.32035732269287	1.2282612323761	-0.8336181640625	-2.08835744857788	-1.22189676761627	-1.48690068721771	-1.36221420764923	-0.913806140422821	0	0	-1.20726692676544	0.379996180534363	-3.28321743011475	-2.38662672042847	-1.77120184898376	-2.1795334815979	0.239442780613899	-0.210214376449585	-1.45147132873535	-1.95960009098053	0.0675640478730202	1.24763011932373	-1.99223303794861	-0.916682362556458
0	0	0	0	0	0	0	0	0	0	0	0	0	0	0	0	0	0	0	-1.31380748748779	0.796470999717712	0.712449073791504	0.935993909835815	0.680904269218445	1.05195605754852	1.75819873809814	0.827975690364838	0	-0.913092851638794	-0.379825621843338	0	0	0	-1.59176969528198	0	-2.24243593215942	-1.92188251018524	0.0606062524020672	-2.14593148231506	0.194112539291382	0.761977076530457	-0.0851097032427788	-0.511210560798645	-0.746306121349335	-0.714682281017303	-0.439455598592758	0.762674450874329	-0.600155234336853	-1.82083642482758	0.00771530019119382
0	0	0	0	0	0	0	0	0	0	0	0	0	0	0	0	0	0	0	-2.10558223724365	1.75440001487732	1.06120300292969	1.1528491973877	0	0.692844748497009	-1.84611999988556	-2.12420201301575	-0.00162715301848948	0	0	0	0	0.775439023971558	1.88295614719391	0	-1.38881421089172	-0.886043429374695	-1.26618337631226	-0.886858105659485	0.022386634722352	0.856754422187805	0.901589393615723	-0.383020788431168	-0.936787903308868	-1.21700847148895	0.627842724323273	1.54128181934357	-0.473549425601959	0.96876323223114	2.29259347915649
0	0	0	0	0	0	0	0	0	0	0	0	0	0	0	0	0	0	-1.27795052528381	-1.56240057945251	0	1.06071639060974	-0.142027422785759	-0.539686322212219	1.72459578514099	0	0	0	0	-0.185977056622505	1.02979242801666	0	0.145253151655197	2.27339029312134	0.146888554096222	0.231991127133369	2.10772681236267	-1.70317554473877	-1.7399777173996	-0.698548018932343	-0.43166321516037	-0.795774161815643	1.22658824920654	-0.864046931266785	-2.55406594276428	1.20881640911102	2.6080048084259	0.389270126819611	0.229385033249855	1.15265321731567
0	0	0	0	0	0	0	0	0	0	0	0	0	0	0	0	0	0.733513057231903	2.10675644874573	-1.72536599636078	1.00366485118866	-0.664948284626007	-0.0317058674991131	1.02999031543732	0	0	0	0	-1.14878344535828	-1.1511777639389	-0.22431892156601	-0.273394733667374	-0.623043894767761	0.833995580673218	-1.57425010204315	-2.53637981414795	0.163852825760841	-1.56862270832062	-1.55189192295074	1.54862999916077	1.23852491378784	-1.30609881877899	0.541369438171387	-1.6327029466629	-2.93101835250854	1.9045215845108	2.07506680488586	-2.17065763473511	-2.47972440719604	-0.697589576244354
0	0	0	0	0	0	0	0	0	0	0	0	0	0	0	0	0.669167578220367	1.76962220668793	2.33621835708618	-0.799483716487885	-0.192847862839699	-1.03907299041748	0.377681195735931	1.57671046257019	0	-1.78303563594818	1.16696000099182	0	-0.604536175727844	0.458792358636856	1.70463061332703	0.967266321182251	0.77350902557373	-1.7147513628006	-3.62708759307861	-1.14343869686127	0.0455519556999207	-0.68681800365448	-0.668361485004425	-1.22118675708771	0.242573976516724	0.118509881198406	0.218523353338242	-0.0830944404006004	0.507860362529755	1.78280127048492	-1.25027847290039	-3.3090226650238	-0.976433396339417	-0.241629987955093
0	0	0	0	0	0	0	0	0	0	0	0	0	0	0	2.20813202857971	2.19071388244629	1.21906507015228	0.246401056647301	-1.30802237987518	-1.09934651851654	-0.0313245989382267	0	0	0	-0.552712380886078	4.06803703308105	4.70239925384521	2.36500453948975	3.15586066246033	5.48624849319458	5.38387584686279	2.67701029777527	-1.3158346414566	-0.857563138008118	0.372999399900436	-0.669314742088318	-1.66106283664703	0.0291226003319025	-1.81765902042389	-2.00775694847107	-0.277749478816986	-0.441263467073441	0.0341865420341492	1.18582284450531	1.44397938251495	-2.45448470115662	-0.100616604089737	0.246866166591644	0.939384937286377
0	0	0	0	0	0	0	0	0	0	0	0	0	0	0.712724208831787	0.254089087247849	-0.886000096797943	0	1.38183784484863	-0.425093054771423	-0.63201904296875	0.350979954004288	0	-0.313065707683563	0.117640607059002	4.32000780105591	3.70698690414429	3.05038547515869	2.6724157333374	2.05894231796265	4.43696546554565	5.98488092422485	4.2380051612854	1.72852504253387	0.646812856197357	-0.540234625339508	-1.10652685165405	-1.950364112854	-0.0307603254914284	-1.70984315872192	-3.18811535835266	-1.59868800640106	-0.136335074901581	-0.0491739735007286	0.847446739673615	0.27007395029068	-2.04306173324585	-0.136125117540359	0.099489800632	1.10714137554169
0	0	0	0	0	0	0	0	0	0	0	0	-0.129692271351814	-0.219509854912758	-0.429958015680313	0	0	-0.578126788139343	1.14644050598145	1.46984624862671	0.1729536652565	-0.487266689538956	1.73226070404053	1.33888399600983	3.52718019485474	6.3721079826355	2.74926972389221	-2.17278432846069	0.218318656086922	-0.828981399536133	0.735266208648682	2.77045893669128	4.84755992889404	3.25445961952209	-0.0506944209337234	-0.398832529783249	-0.335231095552444	-0.513302087783813	-0.196757659316063	-2.10985350608826	-2.99589514732361	-2.07198977470398	1.52578389644623	1.06335914134979	1.16983103752136	-1.35875761508942	-0.915488481521606	-0.838696718215942	1.37642419338226	1.46458864212036
0	0	0	0	0	0	0	0	0	0	0	-2.1083128452301	0.65960431098938	0	0	-0.611855328083038	1.02790021896362	1.18439567089081	-0.876868546009064	0	1.60757100582123	1.87280857563019	0.378472864627838	0.978637397289276	4.90280199050903	3.14494681358337	2.55130100250244	1.73717176914215	-1.07696878910065	-1.24862325191498	-1.35374426841736	-0.0384609550237656	3.39345049858093	3.03526306152344	2.0616672039032	-0.00155316200107336	-1.19487607479095	-0.318198531866074	0.161303594708443	-0.618454933166504	-1.78955507278442	-1.51244044303894	1.64958333969116	1.60064017772675	0.887911021709442	-1.93950212001801	0.045171283185482	1.16952621936798	2.183100938797	1.96215295791626
0	0	0	0	0	0	0	0	0	0	-0.571097254753113	0.423461854457855	0	0	-0.450449585914612	-1.34367597103119	-0.346655070781708	1.24777281284332	0	0.562956094741821	1.67060196399689	2.73025107383728	1.48430621623993	3.16111731529236	7.29487323760986	3.59878873825073	2.71573877334595	1.92878985404968	1.24490201473236	0.502552390098572	-2.16057467460632	-2.47389602661133	0.264568775892258	4.40956592559814	4.71854686737061	1.87181174755096	-1.34370839595795	-1.68556594848633	-0.132140770554543	-0.515777945518494	-0.402088969945908	-0.887525260448456	-1.13028752803802	-1.38866114616394	0.0502433963119984	-0.674548506736755	-0.0668873488903046	1.56143605709076	-0.408284276723862	1.2038162946701
0	0	0	0	0	0	0	0	0	-2.68574213981628	-1.94981253147125	0	0	-0.355499744415283	-1.0506876707077	-1.0032547712326	0	0	0.253184080123901	-1.34677159786224	0.565595507621765	1.6607460975647	0.289350420236588	4.09909343719482	6.2252779006958	6.49387979507446	6.82452583312988	3.4824230670929	2.07378506660461	-0.132110595703125	-2.53829145431519	-3.01292324066162	-1.11282908916473	5.02495861053467	5.86586427688599	0.212664395570755	-1.23953127861023	-0.490132242441177	-0.688439428806305	-0.8921138048172	0.139936551451683	-1.50591766834259	-0.778796553611755	-3.2347297668457	0.374883592128754	1.97777843475342	1.34063053131104	0.83593225479126	-0.969469666481018	1.68055605888367
0	0	0	0	0	0	0	0	0	-2.25430083274841	0	0	0.39629802107811	2.67853140830994	0	0	0	1.3419851064682	3.0520236492157	-0.544264614582062	-0.929214775562286	0.524883925914764	-0.0974019765853882	0.189662128686905	0.871462225914001	5.142737865448	6.83147478103638	5.57027673721313	1.69069612026215	0.117025263607502	-1.80523610115051	-2.29405617713928	-0.436596512794495	2.98852229118347	2.16825127601624	-0.864152669906616	-1.19474565982819	-0.293899118900299	-0.87116539478302	0.821054220199585	2.14527320861816	0.234242364764214	-1.26346361637115	-2.65205597877502	0.701364576816559	1.04497301578522	0.746308863162994	1.04706037044525	-0.578434109687805	1.21258890628815
0	0	0	0	0	0	0	0	-1.1698557138443	0	0	0.986399531364441	0.945253789424896	1.85256683826447	0	0	-2.9592080116272	4.30054140090942	6.79803895950317	3.04227995872498	1.88250267505646	3.50474882125854	4.15787076950073	-1.75593185424805	-0.788498997688293	1.39437484741211	1.3786529302597	2.58921670913696	1.16819775104523	2.16833305358887	-0.0732058435678482	-0.426690638065338	1.2584855556488	1.12618315219879	-1.48413896560669	0.803869366645813	-1.3428897857666	-1.29256951808929	0.460530459880829	0.916424334049225	1.78841578960419	1.47392952442169	-1.24271535873413	-0.701869189739227	-0.589614927768707	-1.02927207946777	-0.831550717353821	-0.0567574389278889	-1.5603119134903	0.6785928606987
0	0	0	0	0	0	0	0.0967503190040588	-1.07089400291443	0	-0.825478374958038	2.13393759727478	0.204200133681297	0	0	0.383724480867386	2.70803928375244	3.4499306678772	4.22257900238037	0.587261140346527	0.357520341873169	5.06177282333374	8.48452472686768	4.78760099411011	1.74782013893127	-1.76840019226074	-1.76592648029327	-0.70364511013031	0.376469641923904	1.17646467685699	0.593528389930725	1.59177958965302	1.12827157974243	0.26292672753334	0.546988964080811	1.74258542060852	-1.05630433559418	-0.261040717363358	1.01734817028046	-1.75043368339539	-1.23882651329041	-0.0210752710700035	0.651191234588623	-1.1076797246933	-2.06443762779236	-0.411530882120132	-0.231226623058319	0.0794866606593132	-1.14541125297546	-0.254475891590118
0	0	0	0	0	0	0.792052745819092	0.250935763120651	0	0	-0.423468351364136	1.58076989650726	0	0	0	2.85806822776794	7.64924097061157	5.76303339004517	3.79696321487427	-0.130707159638405	-0.924805641174316	2.0068621635437	4.076256275177	5.00541687011719	2.85649728775024	0.0279406905174255	0.436696916818619	-0.647557735443115	2.99617695808411	1.61679995059967	-0.382304102182388	0.272927790880203	-1.25104880332947	-1.28779280185699	1.11174774169922	0.726409077644348	-0.11646743118763	1.31901681423187	-0.903394758701324	-0.952159643173218	-1.14562857151031	-1.0747457742691	1.11442255973816	-2.45092272758484	-2.33138084411621	0.700485110282898	1.72570264339447	1.23437178134918	0.613569736480713	-1.75308644771576
0	0	0	0	0	0	0	0	0	-0.195705696940422	1.4523618221283	0	0.636099636554718	-0.894910454750061	1.59462308883667	5.63287353515625	7.28614616394043	6.31180047988892	5.384681224823	-0.163662806153297	-1.06750071048737	0.0809845849871635	0.0502783060073853	1.2931877374649	0.280280262231827	-0.179686844348907	-0.100151129066944	1.37201952934265	0.95221608877182	-0.160821825265884	-0.126444980502129	-0.631283164024353	-0.512936651706696	-0.605738878250122	-0.436793893575668	-0.431496769189835	-1.22006928920746	0.577877104282379	0.930255711078644	0.334343880414963	-1.01666653156281	-0.339038074016571	1.65655136108398	0.127207726240158	-2.54177975654602	0.364419668912888	0.794008374214172	-2.15692377090454	0.296434223651886	0.169285893440247
0	0	0	0	0	0	0	0	0	0	2.00534534454346	2.47468137741089	2.06359910964966	-0.218512922525406	5.32518100738525	4.85679292678833	4.73520708084106	2.46447205543518	2.52954030036926	-0.549334645271301	-1.22143805027008	-0.523394525051117	0.329684495925903	-0.40266016125679	-1.18087911605835	-1.82218611240387	-1.01689445972443	-0.302213966846466	-2.0496711730957	-0.324145168066025	0.702218651771545	-0.837694883346558	-0.423735350370407	-1.43518316745758	-3.40157318115234	-1.79139530658722	-1.45099186897278	-1.53081238269806	-0.46179273724556	-1.47765004634857	-1.15801990032196	0.0202763769775629	0.168608888983727	1.02996003627777	-1.22769236564636	-0.200626984238625	0.0661892518401146	0.290494173765182	0.141707867383957	0.126188576221466
0	0	0	0	0	0	0	0.465727925300598	0	0	0	-1.9055073261261	1.05893623828888	1.89156591892242	-0.528547525405884	-1.40099155902863	2.09422445297241	-0.685539841651917	-1.5203560590744	-0.920104682445526	-0.876911401748657	-0.810365736484528	-1.71696710586548	-1.78391969203949	0.438461035490036	-0.693561494350433	0.438024818897247	-2.37514543533325	-1.34406304359436	1.49705612659454	0.288410902023315	-0.857095420360565	-0.606751084327698	-1.55213725566864	-2.64385962486267	-2.47848606109619	0.793849468231201	-0.910581409931183	-1.87355256080627	-2.13053226470947	-1.47742438316345	0.417268842458725	-0.314052194356918	0.47914120554924	-0.350229978561401	0.260386139154434	-0.215257093310356	0.768906831741333	0.0882056877017021	0.0996554419398308
0	0	0	0	0	0	-0.384096443653107	0	0	0	0	-3.65838074684143	-1.94498467445374	2.07818746566772	-0.427642047405243	-1.42873811721802	0.713610291481018	0.377891093492508	0.0510672256350517	-3.41873979568481	-0.771315455436707	-1.92686641216278	-0.251575022935867	-1.88092005252838	0.323820948600769	1.54995024204254	-0.362596571445465	0.331748068332672	-0.631262004375458	0.459660619497299	-0.147868007421494	-0.0720545724034309	0.623797833919525	0.8722984790802	1.21150076389313	-1.08075749874115	2.16028475761414	0.583326458930969	-0.0101071773096919	-0.0982539430260658	-0.674779891967773	0.556930601596832	0.968741238117218	0.771919846534729	-0.453298479318619	0.768755078315735	-0.357090383768082	-1.53190755844116	0.115403592586517	0.986240923404694
0	0	0	0	0	0	-2.61185622215271	0	0	0	-2.24308443069458	-2.66058301925659	0.262522459030151	0.812826335430145	-0.946081340312958	-1.61744737625122	3.60404109954834	1.1398754119873	1.90206050872803	0.408458381891251	0.492255747318268	-1.67229580879211	-0.526385068893433	-0.442440658807755	-1.09249103069305	-0.664137661457062	-1.72649884223938	0.529038488864899	1.4549103975296	0.962245643138885	1.16010916233063	0.803853213787079	0.0722389668226242	1.39378046989441	2.14762711524963	0.903746664524078	0.644359946250916	-0.372705966234207	0.199222758412361	0.497775346040726	0.977956891059875	-0.754970073699951	0.868888378143311	1.07016539573669	0.105653785169125	0.330656081438065	0.0915594324469566	-0.988223254680634	0.194513946771622	1.73125171661377
0	0	0	0	0	0	-1.97350287437439	0.415737628936768	-1.37381660938263	-0.457328677177429	-2.46206712722778	-0.505281627178192	2.67955541610718	-1.54461169242859	-4.16087865829468	0.201872020959854	4.36168527603149	2.81706738471985	3.30348324775696	1.22175598144531	0.861566603183746	0.62765496969223	-0.526197612285614	0.0721647962927818	-1.54962623119354	-2.66773915290833	-1.35847461223602	-0.216590538620949	1.73554480075836	0.68820983171463	0.0146608157083392	-1.02548015117645	0.0712930709123611	1.91359114646912	1.97724688053131	-0.63570111989975	-0.549164235591888	0.180969789624214	-0.92831552028656	-0.918564796447754	-0.440396070480347	-1.6836519241333	-0.740371227264404	-0.161397472023964	-0.265447676181793	-0.0265933945775032	-0.631588280200958	0.24761737883091	0.415009319782257	1.14491951465607
0	0	0	0	0	0	0	1.2429416179657	2.88889050483704	4.57318830490112	3.21529388427734	1.79624879360199	-0.328505218029022	-1.04854774475098	-2.02579665184021	3.24840307235718	0.674735546112061	3.53953218460083	1.90983128547668	-1.48542618751526	-0.416169434785843	0.35345059633255	-0.6041659116745	-1.74529409408569	-1.53782534599304	-1.30623829364777	-0.554696440696716	-0.67693954706192	1.02081942558289	0.403865873813629	-0.357316225767136	-1.61834728717804	-0.170109421014786	0.0847701504826546	0.572922468185425	-0.392674297094345	0.553534865379333	-0.485907554626465	-0.389059752225876	-0.884730219841003	-0.765599489212036	-0.770991146564484	-1.13489210605621	0.346177339553833	-1.65012311935425	-1.98047780990601	-0.200037702918053	-1.22460460662842	0.270813375711441	-1.3205828666687
0	0	0	0	0	-0.384750723838806	-1.24620604515076	-0.565581738948822	0	0	4.70471096038818	4.68432664871216	1.1867607831955	3.54047274589539	3.51479196548462	2.07181692123413	0.302762269973755	1.7056519985199	-1.50198256969452	-0.705337405204773	-0.885187327861786	-1.81601893901825	-2.51298427581787	-3.68851161003113	-1.79747462272644	0.0815949961543083	-0.286582469940186	0.0265895687043667	0.792721331119537	0.982459783554077	0.914743185043335	-0.934124052524567	-1.93970608711243	-2.47764182090759	-2.3030960559845	-0.497023463249207	1.52556312084198	-0.206794872879982	0.59093165397644	-0.56432044506073	-1.56958174705505	-0.520287275314331	-0.64135080575943	-0.494936734437943	-0.773052573204041	-0.69879424571991	0.598998844623566	0.972321450710297	0.592085659503937	-0.913699746131897
0	0	0	0	0	0.960656821727753	-6.91488218307495	-6.2681097984314	-4.44444847106934	-3.70678472518921	4.0877571105957	8.36351680755615	8.83564758300781	6.52855968475342	2.64244556427002	2.69628357887268	4.59906196594238	0.82110059261322	-1.30243360996246	0.396548599004745	0.667311429977417	-1.36373841762543	-2.86716055870056	-3.03424596786499	-1.65514481067657	-0.97214663028717	-0.262078553438187	1.43484556674957	1.68594491481781	1.27989566326141	1.13345277309418	-0.924870371818542	-2.95012974739075	-2.83088564872742	-2.99489831924438	-2.88419461250305	-0.772887766361237	0.130625635385513	-0.25662100315094	-0.687836766242981	-1.26770770549774	0.432138413190842	0.617174208164215	-1.23835182189941	-0.173354208469391	-0.031675398349762	-0.0880261063575745	1.25057411193848	0.76388692855835	-0.0729321986436844
0	0	0	0	0	-0.566008806228638	-3.70300245285034	-2.94437623023987	1.58801889419556	-2.98243236541748	-0.539211392402649	5.95807933807373	6.06120443344116	3.39686369895935	3.10233473777771	1.3538715839386	1.95338416099548	-1.51678133010864	-1.35713875293732	-0.490653544664383	0.373555421829224	-0.0735824331641197	0.273120850324631	0.902435004711151	-1.01061165332794	-0.332965940237045	-0.14562651515007	0.474200218915939	1.10918235778809	0.386566936969757	0.792714595794678	0.844898521900177	-2.98443245887756	-1.2958927154541	-1.78818595409393	-2.47942924499512	-3.05960941314697	-1.23335838317871	-0.894141256809235	-0.248629808425903	1.13566398620605	2.27515745162964	0.796708345413208	0.399765104055405	-0.711007535457611	-2.4944908618927	-1.03667235374451	-0.818490087985992	0.949077188968658	0.0748006999492645
0	0	0	0	0	-1.79523861408234	2.1238808631897	2.91026401519775	5.43419504165649	-0.251815378665924	-5.41076755523682	-0.3918097615242	0.169434562325478	-0.914052069187164	2.07511043548584	1.34533047676086	0.647776424884796	-0.494724810123444	-1.32485342025757	-0.606976091861725	-1.53602480888367	-1.84587025642395	-0.501386523246765	0.752082765102386	-0.413066059350967	0.00355962640605867	0.148598894476891	-1.90429043769836	-1.1109207868576	-1.25027930736542	0.0292820036411285	0.0587211549282074	-0.704570233821869	-2.16608214378357	-1.47561740875244	0.495917081832886	-1.0649778842926	0.0873000025749207	-0.242730662226677	-1.48124718666077	-0.862378895282745	0.0723036527633667	-1.80081582069397	0.0941344425082207	1.59068179130554	-1.45985519886017	-0.592803180217743	1.74123239517212	1.55182015895844	0.844317376613617
0	0	0	0	0	0	0	1.96832776069641	3.64866709709167	3.15104913711548	-1.30330407619476	1.31943035125732	1.64298129081726	-0.973710775375366	-1.45751857757568	1.18621635437012	0.429310858249664	0.506080567836761	-1.54856026172638	-1.08433032035828	-1.70458519458771	-1.01221299171448	-0.458818703889847	-1.04084384441376	0.698904633522034	0.114235192537308	0.55725759267807	-1.16629469394684	-0.931088268756866	1.60325753688812	-0.369447261095047	-0.523457586765289	-1.20656836032867	-2.0182683467865	-1.46005153656006	0.331018656492233	1.43250715732574	1.05011332035065	0.375268489122391	0.23419813811779	-0.804285764694214	-1.56095731258392	-2.5149073600769	-0.252010017633438	1.37291240692139	-0.600777208805084	0.350848346948624	-0.102537721395493	0.652435719966888	1.88722372055054
0	0	0	0	0	0	0	1.92116057872772	6.48105764389038	5.06575107574463	-0.994603455066681	0.200075194239616	-1.50785219669342	-4.30104446411133	-3.1254711151123	-1.34868621826172	-1.73906576633453	-1.70322668552399	-1.86428952217102	-1.74089419841766	-0.889309823513031	1.13781249523163	1.26741278171539	0.726692855358124	0.912115752696991	0.166929110884666	1.68724477291107	0.297983735799789	-1.0085506439209	2.78463244438171	0.223351001739502	0.112092666327953	-1.31920945644379	-0.916996955871582	-0.237326130270958	-0.258155971765518	1.25369668006897	0.196975782513618	0.0563716888427734	0.537512719631195	0.596693754196167	0.917731642723083	0.0950999334454536	-1.61379253864288	-1.31464612483978	-1.47052752971649	-1.05944931507111	-1.20528125762939	-0.138751193881035	0.876548588275909
0	0	0	0	0	0	0	1.4457426071167	3.62432408332825	1.97690439224243	-4.02723741531372	-5.14510440826416	-4.46411228179932	-4.55590343475342	-1.01457977294922	-1.4581013917923	-0.297646641731262	-2.15749526023865	-0.847494602203369	0.113820143043995	-1.14980947971344	-0.97394722700119	-1.18376922607422	-0.542447328567505	-1.25137090682983	0.184355229139328	1.34885966777802	-0.151126727461815	-1.1097651720047	0.141577556729317	0.64859813451767	-0.398684561252594	0.241768285632133	1.31394028663635	1.28970563411713	0.876317977905273	0.227067455649376	-0.672372162342072	0.249744787812233	-0.0520355105400085	0.493603020906448	2.47356557846069	1.19611322879791	-1.5364682674408	-0.624423682689667	0.104774639010429	-0.8444504737854	0.338812619447708	0.455874621868134	0.199893295764923
0	0	0	0	0	0	0	-2.21537566184998	-3.56142377853394	-2.56585073471069	-7.07114124298096	-9.10409164428711	-5.67867708206177	-3.68151998519897	-0.96004182100296	-2.782062292099	-4.21605157852173	-3.83906841278076	1.03511643409729	-0.325707077980042	-0.621350169181824	-0.695588409900665	-3.06845188140869	-7.09550762176514	-3.47664165496826	0.813148140907288	-2.81490325927734	-0.0833414942026138	2.25962090492249	0.472971737384796	-0.525258362293243	-1.38156461715698	0.568141996860504	-0.618096113204956	-1.10196769237518	0.342813819646835	0.621596097946167	-0.0923995599150658	1.02713561058044	2.01414942741394	1.76787078380585	2.51205945014954	0.639431416988373	0.933431565761566	3.01331639289856	1.79732954502106	0.517623424530029	1.08865106105804	1.38121461868286	0.948540329933167
0	0	0	0	0	0	0	-2.47159266471863	-3.50992918014526	-4.36462354660034	-8.27198886871338	-4.59218120574951	-1.9366112947464	-2.2924268245697	-1.13272500038147	-3.18266701698303	-5.66215705871582	-3.89928650856018	0.00201958627440035	-1.80461466312408	0.314129948616028	0.773816049098969	-0.707544982433319	-6.96824359893799	-6.26124620437622	-2.26082181930542	-3.3947160243988	-1.91366004943848	-0.973973453044891	-2.2578284740448	-0.96483987569809	0.445802867412567	-0.189685374498367	-1.11762368679047	-0.319114297628403	-0.761316299438477	-0.0343690104782581	1.91955924034119	3.33658599853516	4.85827827453613	3.49027395248413	2.90535616874695	2.82859134674072	1.8768789768219	2.74957013130188	0.854100823402405	1.06203782558441	0.367569446563721	1.15877771377563	1.19289481639862
0	0	0	0	0	0	0	0	0	0.241796597838402	-0.0487581454217434	-0.255379647016525	-2.32181620597839	-0.871488273143768	-2.88488411903381	-3.78996539115906	-3.82002663612366	-1.94440972805023	-2.75836801528931	-4.78857040405273	-1.75428581237793	-1.94677639007568	-1.96691739559174	-1.91719579696655	-3.59100103378296	-4.83703756332397	-4.06968927383423	-3.69110703468323	-3.05745601654053	-2.39334106445312	-2.65491509437561	-2.76196479797363	-0.387964636087418	0.132776856422424	0.465611964464188	-1.09525108337402	1.18280494213104	4.13114547729492	4.14086818695068	4.43635368347168	-2.87775468826294	-2.42246890068054	1.99991536140442	-0.155968070030212	-0.293407201766968	-0.184360191226006	-0.0793284252285957	-2.17876005172729	-2.06696248054504	0.263867259025574
0	0	0	0	0	0	0	0	0	0	-0.32696658372879	-2.15789580345154	-0.957469046115875	-1.10744869709015	-1.0394207239151	-1.07489311695099	-0.0996997505426407	0.422109365463257	-0.848461091518402	-3.32192420959473	-2.98447346687317	-4.64276361465454	-4.58737087249756	-1.40233719348907	0.273016661405563	-2.1719753742218	-3.10598850250244	-2.57202672958374	-1.18141305446625	-1.07194805145264	-3.5411102771759	-4.84565019607544	-0.978224396705627	1.00281393527985	-0.0772645846009254	-2.42273998260498	0.911114096641541	2.85501146316528	4.00457334518433	3.7245352268219	-4.22545003890991	-1.21032583713531	1.56735920906067	0.748801648616791	-1.03360843658447	-0.719791948795319	0.372582137584686	-0.615897357463837	-1.30830800533295	-0.474680304527283
0	0	0	0	0	0	0	0	0	-1.17280113697052	-1.49189782142639	1.83305096626282	1.46376919746399	-1.35864925384521	0	1.9761198759079	1.4574419260025	0.745891630649567	0.202033162117004	-0.413632929325104	-0.888769745826721	-2.71645665168762	-2.80544543266296	-2.980473279953	0.27875280380249	1.54686224460602	-0.764099478721619	-0.0417770482599735	-0.577335596084595	-2.03533959388733	-2.65173959732056	-3.29777550697327	-2.79734086990356	-0.150681331753731	0.536418914794922	-1.88229835033417	0.256294697523117	-0.165367096662521	0.0266514364629984	0.191233456134796	-0.777729690074921	1.12125837802887	1.73352801799774	2.33392930030823	0.401998221874237	-0.950592696666718	-0.23314256966114	1.09832918643951	1.24795734882355	-0.951505959033966
0	0	0	0	0	0	0	0	0	3.33557796478271	3.30325770378113	3.26573967933655	-1.19296932220459	-0.467587202787399	2.55299139022827	2.54210829734802	2.19316649436951	-0.0558735467493534	-2.17267608642578	-1.72206270694733	-3.11759495735168	0.623496770858765	0.53166651725769	-1.18945145606995	-2.16542625427246	-3.11093425750732	-2.01704335212708	0.420125395059586	-2.80427217483521	-4.28470182418823	-1.51007974147797	-2.93401646614075	-3.28562355041504	-1.55674755573273	1.70986008644104	0.324739962816238	0.455288082361221	0.126115426421165	-0.468795895576477	1.90697002410889	0.248979583382607	-1.40631914138794	0.565105140209198	1.58245837688446	1.4642881155014	-0.659752428531647	-0.684805035591125	-0.0373578108847141	1.38781785964966	-0.464508414268494
0	0	0	0	0	0	0	0	3.343581199646	3.98965549468994	3.64814496040344	3.41894221305847	4.99249315261841	5.59977769851685	1.75197553634644	5.02240037918091	2.27503514289856	-0.995135605335236	-1.15202844142914	-3.3765025138855	-5.31473255157471	-4.18253803253174	-0.971687734127045	-1.78036463260651	-2.59203934669495	-1.83701264858246	-1.72845113277435	-0.442875683307648	-1.36544251441956	-2.57967162132263	-0.0819396749138832	-2.66053700447083	-1.92581951618195	-0.706671595573425	1.60018193721771	-0.0318304225802422	-1.1387974023819	-0.248350605368614	0.321953922510147	2.09426259994507	1.11363279819489	0.540092885494232	-1.74254107475281	0.485192000865936	1.0361510515213	0.331654131412506	2.30586433410645	0.555525898933411	1.41776514053345	1.30223548412323
0	0	0	0	0	0	0	-0.0412115193903446	1.29657971858978	1.14068198204041	-0.0740078538656235	8.24858093261719	13.0548629760742	9.83311557769775	6.65036010742188	7.57349538803101	2.51928234100342	-0.239026844501495	0.375861555337906	-2.01313138008118	-3.46647000312805	-5.87804841995239	-2.18898606300354	0.0516584888100624	-0.895517945289612	-0.351767748594284	-0.0371860899031162	-0.299087673425674	0.632800579071045	0.89469963312149	1.42626428604126	-0.416848540306091	-1.70038211345673	0.38283434510231	0.672022223472595	-0.526986062526703	0.338913440704346	1.06543445587158	0.0596054643392563	0.974676191806793	2.28235149383545	-0.272719085216522	0.180393919348717	0.410576790571213	0.109439171850681	1.04101824760437	0.936264872550964	2.05158519744873	2.46631169319153	0.0612979531288147
0	0	1.08543992042542	0.598360657691956	1.76095831394196	0	0	0.975336611270905	4.03878021240234	6.17136096954346	0.413174450397491	8.91618061065674	13.1503438949585	14.3565530776978	10.2134838104248	6.14218854904175	2.08628344535828	0.533616423606873	-1.07957637310028	0.187303885817528	0.83334481716156	-0.762891232967377	-0.993044316768646	0.893448531627655	-0.214447513222694	-0.0134938592091203	0.612439334392548	0.955592334270477	1.17734968662262	-0.228195771574974	0.360525459051132	0.112101674079895	-2.23285794258118	0.450339078903198	1.63944184780121	-0.356762200593948	1.13083863258362	0.612714231014252	-0.335373371839523	0.460687726736069	1.73930156230927	-1.30034530162811	-0.625480592250824	-0.266713380813599	-0.142087355256081	-1.28021502494812	-0.526529490947723	1.25325453281403	1.68344640731812	0.293292194604874
0	0	-0.329365819692612	1.37035834789276	3.77153730392456	0	0	-0.651623547077179	-0.046982254832983	2.07056140899658	-0.679454743862152	0.959123492240906	10.4772214889526	14.911226272583	10.0427179336548	1.04102039337158	1.48035418987274	0.588365733623505	-1.32266891002655	-0.171476617455482	0.673453211784363	2.47132015228271	-0.518692076206207	-0.926036894321442	-0.273014783859253	1.10143625736237	0.129767239093781	0.411706387996674	0.504420936107635	-0.99856698513031	-1.5737487077713	-0.935923337936401	-1.09327483177185	0.297325313091278	-0.523971796035767	-1.43416810035706	-0.0991933345794678	0.894313454627991	1.05787169933319	-1.05810701847076	-1.13888967037201	-1.04589474201202	-1.42964136600494	-0.281611561775208	0.393450438976288	-2.25908613204956	-0.632948517799377	-0.487018287181854	0.0755500271916389	0.319231778383255
0	0	0	0.58707457780838	1.46774840354919	0	0	0.0250933486968279	0.354335188865662	2.63153862953186	5.74287796020508	4.21989107131958	0.734977960586548	5.6253662109375	9.27932071685791	5.81170797348022	4.19653940200806	3.28892374038696	1.36357569694519	-0.643227219581604	-1.81989920139313	-1.17383861541748	-1.10258364677429	1.4584367275238	0.540604293346405	0.282155334949493	0.128465816378593	-1.77744770050049	0.0320160053670406	2.52348279953003	-0.800880014896393	-0.938630700111389	0.809952020645142	0.141182258725166	-3.53765416145325	-2.22898077964783	-0.991538226604462	1.91657531261444	2.54782462120056	-1.20109975337982	-2.41501760482788	-1.12803637981415	-0.484150409698486	0.122196689248085	-0.0744763612747192	-0.886246860027313	-0.925759375095367	-0.492627650499344	0.849644958972931	0.781153559684753
0	0	0	0	0	0	0	0	0	2.80679416656494	5.99740934371948	6.45697450637817	0.603524148464203	-4.21787071228027	0.197964578866959	3.86014938354492	4.46999454498291	1.32933390140533	2.1186728477478	-0.0742069482803345	0.533969223499298	-0.133186548948288	-1.09661853313446	0.550122261047363	0.168577790260315	-1.28145480155945	-1.94738721847534	-0.822418570518494	1.11956655979156	0.925596475601196	0.571200847625732	0.161345988512039	0.691463708877563	-0.896298885345459	-1.75547301769257	-1.17160665988922	0.112562373280525	-0.415508776903152	0.973949432373047	1.0065643787384	-0.57727712392807	-1.19556498527527	-1.33856320381165	-1.31067979335785	-1.41884481906891	-1.05440783500671	-1.43115234375	-0.0782647877931595	1.36254739761353	1.44580280780792
0	0	0	0	0	0	0	0	0	-1.34401166439056	1.35637676715851	2.53770470619202	1.78578281402588	1.56015026569366	-2.86672520637512	-2.1262538433075	0.546906471252441	-1.32397615909576	0.717128694057465	0.158946096897125	0.778083086013794	0.614377975463867	-1.08114242553711	-1.13655638694763	-0.285385549068451	-1.27034735679626	-1.16456353664398	-0.670423924922943	-0.952719926834106	0.194250360131264	1.01873445510864	0.250643342733383	-0.270352691411972	-1.70291543006897	-1.31144881248474	-1.42305338382721	-0.893472790718079	-0.609582185745239	-0.255661100149155	-0.100611329078674	2.54334878921509	0.893867492675781	-1.28669619560242	-2.10915517807007	-0.00411740550771356	-0.651224195957184	-0.954314351081848	-0.853264987468719	-0.664801716804504	-0.600933194160461
0	0	0	0	0	0	0	0	0	-2.65400552749634	-0.679112076759338	0.37953919172287	0.803804099559784	2.76116800308228	0.371673077344894	-0.809874355792999	0.191083267331123	0.0360233597457409	-0.232970774173737	-0.957477211952209	-1.80471253395081	0.0731096938252449	-1.0756139755249	-0.1394432336092	-0.0050645750015974	-0.341845571994781	-0.972299873828888	-1.23094797134399	-2.26068019866943	0.29107728600502	1.00343084335327	-0.157192260026932	-0.98051905632019	-0.527270317077637	-1.41115617752075	-2.42400670051575	0.223145768046379	0.882326066493988	0.519467890262604	-1.04626977443695	2.10352087020874	1.04099059104919	-1.29061555862427	-1.57044911384583	0.276173770427704	0.800803899765015	-1.24857938289642	0.054924700409174	-0.562506675720215	-1.63617086410522
0	0	0	-0.920060217380524	0.310547977685928	0	0	0	0	0	0.522433042526245	3.91543245315552	4.8336820602417	1.03169310092926	-2.3415801525116	-0.234365776181221	2.56888318061829	1.93890416622162	0.774780213832855	-2.19822692871094	-1.33827590942383	0.0527874678373337	-0.899328112602234	1.11579883098602	-0.0148656563833356	-0.728477537631989	-1.83670818805695	-1.23496282100677	-1.4175843000412	-0.820338487625122	-0.445804357528687	-0.114085286855698	-0.55990082025528	0.0390787646174431	-1.15744531154633	-1.8495169878006	2.04358434677124	0.711332857608795	-0.590103387832642	-0.935920298099518	1.28901588916779	1.20098686218262	-1.0349155664444	-1.82613623142242	0.127133205533028	0.428110301494598	-0.854489862918854	2.23764085769653	0.0180589742958546	-0.994223356246948
0	0	0	0	0	0	-1.09207797050476	0	0	0	0	2.76860952377319	2.97609400749207	-1.47958564758301	0.768336534500122	1.28824102878571	0.339345753192902	1.2364137172699	1.45607054233551	-0.870175004005432	-0.45205745100975	-1.67193651199341	-1.26645147800446	-0.586007356643677	-0.471562623977661	-1.93279933929443	-0.837372899055481	-0.357596814632416	0.0607061050832272	-1.71244156360626	-2.34687685966492	-0.219883143901825	-0.312971293926239	-0.965329527854919	-1.23233044147491	-0.25827819108963	1.11667215824127	-0.937487423419952	-3.06249976158142	-1.34738409519196	1.82632780075073	0.466968506574631	-0.565728366374969	-1.48109579086304	0.323221474885941	-0.363869845867157	-0.673554837703705	1.801265001297	0.265159130096436	-0.34020146727562
0	0	0	0	-1.56268787384033	0.813808679580688	-0.852209389209747	0	0	0	0	0	7.28889751434326	5.16849184036255	2.41072535514832	1.1084578037262	-1.12438344955444	-0.528944075107574	1.56307482719421	4.68807125091553	-0.780426740646362	-1.543989777565	0.053860779851675	-0.79624879360199	-0.927699863910675	-1.16008877754211	-1.55775129795074	1.04925680160522	2.59053874015808	0.393079817295074	-1.11497044563293	-1.37955796718597	-1.37055230140686	-0.969009280204773	-1.07481944561005	-0.732456803321838	-0.348463922739029	-1.48406863212585	-2.03547024726868	-1.59016084671021	1.31690466403961	-1.75575339794159	-0.604819476604462	0.602180480957031	0.518686652183533	-0.0418546088039875	-0.540392458438873	-0.361839920282364	1.54537582397461	0.988592386245728
0	0	0	0	0.445746064186096	-0.164905562996864	-0.374876946210861	0.506872713565826	0	0	0	-0.567067444324493	8.85731983184814	10.9869680404663	7.61753702163696	4.64859390258789	0.225273445248604	-2.17986273765564	0.266101688146591	7.69329452514648	6.02933120727539	1.79972887039185	0.581198453903198	0.247238084673882	0.483096867799759	0.918408095836639	-1.44650709629059	-1.17923736572266	-0.402904510498047	2.33159875869751	2.41342735290527	-1.54804635047913	-0.48916432261467	-1.09105515480042	-0.00974276568740606	-0.723188817501068	-0.138182178139687	-0.946803748607635	-0.106529355049133	-0.531146764755249	1.23379623889923	-0.897894978523254	-0.461954921483994	1.36026918888092	1.62946367263794	-0.225911766290665	0.147686079144478	-0.966226041316986	2.13594961166382	3.24033379554749
0	0	0	0	0	-0.969150722026825	1.66727197170258	0	0.527168214321136	-1.38363742828369	0	0	3.01377630233765	8.52673721313477	6.67431592941284	4.88957405090332	1.77712941169739	-1.38336896896362	-2.41754293441772	4.65770435333252	6.77733182907104	2.07924103736877	-1.12871813774109	0.991967856884003	3.96637797355652	2.85113739967346	-0.284999042749405	-0.0917929261922836	-1.67998588085175	-0.407508224248886	1.45738649368286	1.38881862163544	-0.717080354690552	-0.894308626651764	1.15469431877136	-0.339006572961807	-0.0177605170756578	-0.00445543508976698	0.424895703792572	0.403350949287415	0.873185753822327	1.00614356994629	0.516503274440765	1.15940618515015	1.19834864139557	0.414049476385117	-1.27653098106384	-0.857576012611389	0.90523099899292	1.35499787330627
0	0	0	0	0	0	0	0	-1.62871038913727	1.08507180213928	-0.87959498167038	0	0	0	-3.01197338104248	-0.795373022556305	-0.32428389787674	-0.195759549736977	-3.26055359840393	-0.865224063396454	1.34075820446014	-0.0181781686842442	-0.692178964614868	1.06831526756287	4.32076787948608	4.74436187744141	2.06072211265564	1.59852266311646	-0.0530965067446232	-2.4436891078949	-0.587023258209229	1.97143185138702	-0.451983720064163	0.498842030763626	0.309821724891663	-0.151506438851357	-0.381437420845032	-0.298893958330154	0.240096420049667	-0.421627730131149	-0.17247474193573	-0.751302361488342	0.421564519405365	0.766558408737183	0.0688032880425453	3.16448020935059	0.88804018497467	-0.432815164327621	1.12694334983826	0.821112394332886
0	0	0	0	0	0	-0.38772714138031	1.19078457355499	-1.89794909954071	-0.627755522727966	-0.578084111213684	0	0	0	0	-3.29066061973572	-3.71759510040283	0.6430304646492	0.642134010791779	-0.625526189804077	-1.29414319992065	0.400741934776306	2.01957559585571	2.7078332901001	3.14069771766663	6.71689128875732	4.31912326812744	0.896177351474762	0.331488013267517	-1.1513364315033	0.142169803380966	-0.0764959678053856	0.680209040641785	1.50754535198212	1.09843623638153	1.23734223842621	0.323753446340561	-0.528475224971771	0.117906801402569	0.0112995374947786	0.315889626741409	-2.22793841362	-1.57455289363861	-0.210554927587509	-0.635042309761047	1.67454934120178	1.97764706611633	-0.0369202457368374	0.917703926563263	0.491462826728821
0	0	0	0	0	0	0	0.890413582324982	-0.33889964222908	0	0	-0.116741888225079	0	0	0	0	-0.0687779933214188	0.808750629425049	2.80402112007141	1.43134558200836	1.46204459667206	-0.984841406345367	1.39372909069061	6.26383876800537	8.11055183410645	7.72244691848755	5.41259145736694	4.75823402404785	0.562503039836884	-0.0447266772389412	0.48530375957489	0.609471321105957	-0.225590616464615	1.20437788963318	3.55248594284058	2.46544241905212	1.34460401535034	-0.00485691800713539	0.0885967239737511	1.77291142940521	1.05276882648468	-0.117330685257912	-1.66390550136566	-0.00331303989514709	-0.678475379943848	-2.64144515991211	-1.12939810752869	-0.365073084831238	-0.370252788066864	-0.523905277252197
0	0	0	0	0	0	0	0	-0.585408270359039	-0.16283130645752	0	0	0	0	0	0	0	-0.139659434556961	3.04896187782288	0.624979019165039	1.69362497329712	-1.120276927948	4.15222883224487	7.9470067024231	10.5878410339355	9.22553825378418	2.99481081962585	1.99314785003662	0.344668477773666	0.556548297405243	0.872596383094788	-0.273219048976898	-2.45148658752441	-0.414315104484558	0.229069441556931	0.261885017156601	0.841190338134766	-1.16918003559113	0.517103731632233	0.445052057504654	-0.849690318107605	0.172153308987617	0.631121814250946	2.25500154495239	-0.302263587713242	-1.58627617359161	-1.38024938106537	-1.02269291877747	-0.654147803783417	-0.593874990940094
0	0	0	0	0	0	0	0	0	-0.105964466929436	-0.386335402727127	0	0	1.76164042949677	0	0	0	-1.01321268081665	1.18233489990234	1.28773021697998	1.33696901798248	0.944622874259949	3.7839686870575	8.41086578369141	9.33580493927002	5.37729215621948	1.33186936378479	0.282294660806656	0.355827778577805	0.437830954790115	-1.0825446844101	0.0903590619564056	-0.0393150337040424	1.638671875	3.18510627746582	-0.232674464583397	-0.289538711309433	0.438056111335754	-0.74998527765274	-1.55408334732056	-0.836495280265808	-0.583346128463745	-0.0655209347605705	-0.406375497579575	-0.991601824760437	-1.40399622917175	0.455896288156509	-1.04067647457123	-0.741936922073364	-0.375768095254898
0	0	0	0	0	0	0	0	0	0	-0.0525808483362198	-0.8910813331604	0	0	-0.205266952514648	-1.6836941242218	-1.4748842716217	-0.491744041442871	1.06158375740051	0	1.078822016716	2.65286946296692	3.39477062225342	9.22117233276367	8.67326068878174	-0.279661357402802	0.291236251592636	0.979549527168274	1.23845624923706	-0.494277358055115	-0.900029718875885	3.63397884368896	5.81477832794189	6.53222274780273	7.59430646896362	2.26398849487305	-0.452005416154861	-0.285544157028198	-0.865658760070801	-0.0465810708701611	-1.51855087280273	-0.209725826978683	0.201378643512726	-1.85098397731781	0.0464043989777565	-0.516762793064117	1.24805641174316	-1.17781484127045	-2.17173171043396	-0.135555222630501
0	0	0	0	0	0	0	0	0	0.0910018607974052	-0.252110064029694	-0.527142703533173	0	0	0	-3.00134015083313	-1.57984006404877	0	0	0	1.053866147995	4.07778072357178	4.80352401733398	7.65673685073853	8.81312370300293	1.22793245315552	-0.0353489741683006	-0.02869026735425	1.51507616043091	0.180628791451454	2.79577660560608	7.29860162734985	7.18059015274048	5.79140186309814	6.14527797698975	4.65788888931274	0.685272037982941	-0.800992429256439	1.20371401309967	1.9440952539444	-0.825164318084717	1.33160853385925	1.02635622024536	-1.12563455104828	0.854138255119324	0.356116503477097	-0.430647015571594	-2.34447908401489	-1.09240007400513	0.226249605417252
0	0	0	0	0	0	0	0	0	0	-0.058787640184164	-0.753092110157013	-1.68180096149445	1.27115094661713	0	0	-1.48026180267334	-0.382364422082901	-0.708135366439819	-1.52631747722626	0	0	-0.70744526386261	4.07406091690063	8.24007511138916	3.81169724464417	3.32897353172302	0.818863093852997	0.349913418292999	2.2934775352478	4.52941131591797	7.69375658035278	5.4050350189209	1.65515851974487	3.61435294151306	4.56987428665161	2.22855758666992	1.14313542842865	0.525770902633667	0.17654712498188	1.01666820049286	2.07847046852112	-0.439067095518112	-2.68751859664917	-0.289809137582779	-0.168654263019562	-1.71453988552094	-2.18064188957214	0.272031158208847	-1.37881767749786
0	0	0	0	0	0	0	0	0	0	0	0	-0.561696469783783	-0.671246647834778	0	0	-0.98200660943985	-1.05196559429169	0.421999871730804	1.1843193769455	0.282781362533569	0	0	-1.02313184738159	2.9794819355011	3.57296466827393	3.75109362602234	5.2192530632019	1.62070262432098	4.13910913467407	5.76494455337524	6.14406681060791	6.88202333450317	3.717928647995	2.88075590133667	3.72557640075684	2.55461812019348	-1.07898259162903	-2.8006899356842	-1.64119589328766	0.132475018501282	1.27005457878113	-1.57950246334076	-3.4978141784668	-0.478877246379852	-0.943851828575134	-1.33564293384552	-0.946806013584137	-0.694341540336609	-3.81889724731445
0	0	0	0	0	0	0	0	0	0	0	0	0	0.151252448558807	0	0	-1.22353827953339	0	-0.296484887599945	0.920689523220062	2.36180210113525	0.76356315612793	0	-0.172964856028557	0.0927186831831932	1.99087846279144	1.84004390239716	7.06278085708618	7.75485801696777	6.19539833068848	4.02189588546753	4.28216552734375	4.73327016830444	4.29736566543579	2.65065693855286	1.97071921825409	1.26058256626129	-0.385640352964401	-0.516068875789642	-0.0574750900268555	-0.927659511566162	-1.30247116088867	-1.24851906299591	-1.96169626712799	-0.120395295321941	-1.00774621963501	-1.34910809993744	-2.10820889472961	-1.02809298038483	-2.32347941398621
0	0	0	0	0	0	0	0	0	0	0	0	0	0	0	0	-1.30188727378845	0.784067153930664	-0.239151492714882	0	2.6529529094696	0.814340114593506	1.78581440448761	0	0	0	0	5.99283361434937	8.13465118408203	4.7281379699707	3.87673211097717	1.98655033111572	3.80477976799011	3.42734050750732	1.46999168395996	0.488355368375778	0.428972631692886	0.819096326828003	0.609928011894226	0.12710177898407	0.879367470741272	-1.94508183002472	-2.36417722702026	-1.36294913291931	-1.75195336341858	-1.26898372173309	-1.82632482051849	-2.5223560333252	0.505627810955048	-1.36532914638519
0	0	0	0	0	0	0	0	0	0	0	0	0	0	0	0	0	0.879074692726135	2.99575018882751	1.9423416852951	1.90012645721436	-2.1153450012207	0.768179833889008	1.09723818302155	0	1.73780429363251	0	0	0	2.33020234107971	2.565354347229	1.66777765750885	4.08877038955688	0.769360244274139	0.33526411652565	-0.567863941192627	0.0967686995863914	1.28558051586151	0.550565600395203	0.534044146537781	1.07340288162231	0.0643349289894104	-1.50445294380188	-1.01695609092712	-1.69972109794617	-1.16426777839661	-0.88970935344696	-1.3039139509201	-0.0101146791130304	-0.97007691860199
0	0	0	0	0	0	0	0	0	0	0	0	0	0	0	0	0	0	-1.12587761878967	0.867471277713776	0.465434432029724	0	-1.52130961418152	0.229515880346298	-1.31456005573273	0.689601302146912	0	0	0	0	-1.67762458324432	1.566685795784	-0.524950802326202	-2.09418892860413	-1.16128361225128	-2.33328413963318	0.146495789289474	1.41490662097931	1.1086186170578	0.999355137348175	-1.66766726970673	0.699957609176636	-0.25213611125946	-1.54712224006653	-0.905115187168121	-2.18662977218628	-0.491341352462769	-0.4737708568573	-1.88946866989136	-0.850244581699371
0	0	0	0	0	0	0	0	0	0	0	0	0	0	0	0	0	0	0	-1.59193789958954	2.24345421791077	0	0	0.963731706142426	0.404506713151932	-0.0851433500647545	-0.36894229054451	0	0	0.977362751960754	-0.568092346191406	-0.481456249952316	-1.82431411743164	0.0183073207736015	-1.68358206748962	-2.89664483070374	-0.0288824532181025	0.12550750374794	-0.674376666545868	-0.603705704212189	-2.34750914573669	-2.07580208778381	-0.512784540653229	-1.40432608127594	-1.20728576183319	-3.23626804351807	-2.11356639862061	-0.458189368247986	-1.82066905498505	-1.06977307796478
0	0	0	0	0	0	0	0	0	0	0	0	0	0	0	0	0	0	0	-1.01045334339142	0.865376234054565	-0.108426094055176	-0.371862500905991	0	0	0	-0.0638016164302826	0.663461565971375	2.02987813949585	1.03761231899261	0	0	0	-0.714591205120087	-0.913710951805115	-1.92999958992004	-2.91725182533264	-1.00073027610779	-2.79732227325439	-0.783489882946014	-1.07951438426971	-1.28913497924805	0.638128280639648	1.02572405338287	-0.0199354030191898	0.204206675291061	-1.59106886386871	0.989976406097412	0.606041491031647	-0.401932299137115
0	0	0	0	0	0	0	0	0	0	0	0	0	0	0	0	0	0	0	0	-1.37010145187378	-1.04140210151672	0.735849797725677	-0.861831307411194	-1.41133403778076	-0.425923377275467	1.32154166698456	-0.548138916492462	0	0.0854488685727119	1.63230013847351	1.05741953849792	-0.468248605728149	-0.432397782802582	0.982027113437653	0	-2.10684967041016	-2.08544588088989	-2.14314889907837	-1.18240094184875	-1.21439492702484	-0.221846923232079	0.113000385463238	1.04412066936493	-0.516515374183655	2.24499011039734	2.9245593547821	1.89229202270508	0.646050989627838	1.23375654220581
0	0	0	0	0	0	0	0	0	0	0	0	0	0	0	0	0	0	0	0	0	0	0.81121438741684	0.294113874435425	-0.628576815128326	0.119081422686577	0.391025394201279	-2.05242490768433	-4.19285345077515	0.460883915424347	1.09822034835815	-0.52984482049942	-0.575703978538513	0.24847112596035	-1.24094486236572	-0.370116919279099	-1.11993718147278	-1.03122675418854	0	-2.12758946418762	-1.28211760520935	-0.402192384004593	-0.942655324935913	0.432205945253372	-1.22178030014038	1.2166451215744	3.13123559951782	1.68651807308197	1.97681605815887	0
0	0	0	0	0	0	0	0	0	0	0	0	0	0	0	0	0	0	0	0	0	0	0	0	-0.983596861362457	-0.140950232744217	-1.49775910377502	-1.757359623909	-0.0109475702047348	0.521418690681458	1.38996839523315	0	-1.97816920280457	-0.985352098941803	-0.749294757843018	-1.10952568054199	-0.989549040794373	0.344800114631653	0.0236451998353004	-1.17841482162476	-0.814532995223999	-0.818129062652588	-0.46850112080574	-0.581209301948547	-1.86483550071716	0	0	0	0	-0.196695998311043
0	0	0	0	0	0	0	0	0	0	0	0	0	0	0	0	0	0	0	0	0	0	0	0	0	0	0	0	-0.942853629589081	-1.22693490982056	-1.07256674766541	-0.148483887314796	-1.9353164434433	-1.86905741691589	1.40015029907227	-0.379328906536102	-1.12956440448761	-0.741506159305573	-0.394008755683899	-0.705983459949493	-0.846329391002655	-1.51499164104462	-0.646541714668274	0.344227194786072	-0.848584115505219	-0.379048675298691	1.33948409557343	1.13111615180969	0.717844784259796	0.24117910861969
0	0	0	0	0	0	0	0	0	0	0	0	0	0	0	0	0	0	0	0	0	0	0	0	0	0	0	0	0	0	0	-1.00692772865295	-3.16095352172852	-2.21395134925842	0.553109169006348	0.550817310810089	0.0547134354710579	-0.668078541755676	-1.52530288696289	-2.66842484474182	-2.36212372779846	-1.37297475337982	-0.662032544612885	-0.464874476194382	0.570078551769257	-0.224762052297592	-0.577731907367706	0.664659023284912	0.81657201051712	1.83750021457672
0	0	0	0	0	0	0	0	0	0	0	0	0	0	0	0	0	0	0	0	0	0	0	0	0	0	0	0	0	0	0	0	-1.52829921245575	-0.505551338195801	-0.685200333595276	-0.481371819972992	0.904456496238708	0.566935002803802	-0.231824845075607	-1.213099360466	-2.46485877037048	-0.848596274852753	-0.543786406517029	-0.456714272499084	-0.382065325975418	-0.607162833213806	0.58872652053833	0.102608993649483	-0.0352262146770954	0.797594845294952
0	0	0	0	0	0	0	0	0	0	0	0	0	0	0	0	0	0	0	0	0	0	0	0	0	0	0	0	0	0	0	0	0	0	0	0	0	0.612543821334839	0	0	-0.790044784545898	-0.211877644062042	-0.0274553615599871	-1.18233156204224	-0.362225532531738	1.50820994377136	1.1460645198822	1.03733217716217	-0.527705907821655	-0.607322573661804
0	0	0	0	0	0	0	0	0	0	0	0	0	0	0	0	0	0	0	0	0	0	0	0	0	0	0	0	0	0	0	0	0	0	0	0	0	0	0	0	-0.045823659747839	0.112148836255074	-0.081960916519165	-1.28588926792145	0	0	0.660397827625275	0.769650876522064	1.30403017997742	0.156751915812492
0	0	0	0	0	0	0	0	0	0	0	0	0	0	0	0	0	0	0	0	0	0	0	0	0	0	0	0	0	0	0	0	0	0	0	0	0	0	0	0	-0.135342121124268	0.162620678544044	0.0775966718792915	-0.0184659510850906	-1.92668604850769	0	0	0	2.3276948928833	0.852200746536255
0	0	0	0	0	0	0	0	0	0	0	0	0	0	0	0	0	0	0	0	0	0	0	0	0	0	0	0	0	0	0	0	0	0	0	0	0	0	0	0	0	0	0	0	0	0	0	0	0	0
0	0	0	0	0	0	0	0	0	0	0	0	0	0	0	0	0	0	0	0	0	0	0	0	0	0	0	0	0	0	0	0	0	0	0	0	0	0	0	0	0	0	0	0	0	0	0	0	0	0
0	0	0	0	0	0	0	0	0	0	0	0	0	0	0	0	0	0	0	0	0	0	0	0	0	0	0	0	0	0	0	0	0	0	0	0	0	0	0	0	0	0	0	0	0	0	0	0	0	0
0	0	0	0	0	0	0	0	0	0	0	0	0	0	0	0	0	0	0	0	0	0	0	0	0	0	0	0	0	0	0	0	0	0	0	0	0	0	0	0	0	0	0	0	0	0	0	0	0	0
0	0	0	0	0	0	0	0	0	0	0	0	0	0	0	0	0	0	0	0	0	0	0	0	0	0	0	0	0	0	0	0	0	0	0	0	0	0	0	0	0	0	0	0	0	0	0	0	0	0
0	0	0	0	0	0	0	0	0	0	0	0	0	0	0	0	0	0	0	0	0	0	0	0	0	0	0	0	0	0	0	0	0	0	0	0	0	0	0	0	0	0	0	0	0	0	0	0	0	0
0	0	0	0	0	0	0	0	0	0	0	0	0	0	0	0	0	0	0	0	0	0	0	0	0	0	0	0	0	0	0	0	0	0	0	0	0	0	0	0	0	0	0	0	0	0	0	0	0	0
0	0	0	0	0	0	0	0	0	0	0	0	0	0	0	0	0	0	0	0	0	0	0	0	0	0	0	0	0	0	0	0	0	0	0	0	0	0	0	0	0	0	0	0	0	0	0	0	0	0
0	0	0	0	0	0	0	0	0	0	0	0	0	0	0	0	0	0	0	0	0	0	0	0	0	0	0	0	0	0	0	0	0	0	0	0	0	0	0	0	0	0	0	0	0	0	0	0	0	0
0	0	0	0	0	0	0	0	0	0	0	0	0	0	0	0	0	0	0	0	0	0	0	0	0	0	0	0	0	0	0	0	0	0	0	0	0	0	0	0	0	0	0	0	0	0	0	0	0	0
0	0	0	0	0	0	0	0	0	0	0	0	0	0	0	0	0	0	0	0	0	0	0	0	0	0	0	0	0	0	0	0	0	0	0	0	0	0	0	0	0	0	0	0	0	0	0	0	0	0
0	0	0	0	0	0	0	0	0	0	0	0	0	0	0	0	0	0	0	0	0	0	0	0	0	0	0	0	0	0	0	0	0	0	0	0	0	0	0	0	0	0	0	0	0	0	0	0	0	0
0	0	0	0	0	0	0	0	0	0	0	0	0	0	0	0	0	0	0	0	0	0	0	0	0	0	0	0	0	0	0	0	0	0	0	0	0	0	0	0	0	0	0	0	0	0	0	0	0	0
0	0	0	0	0	0	0	0	0	0	0	0	0	0	0	0	0	0	0	0	0	0	0	0	0	0	0	0	0	0	0	0	0	0	0	0	0	0	0	0	0	0	0	0	0	0	0	0	0	0
0	0	0	0	0	0	0	0	0	0	0	0	0	0	0	0	0	0	0	0	0	0	0	0	0	0	0	0	0	0	0	0	0	0	0	0	0	0	0	0	0	0	0	0	0	0	0	0	0	0
0	0	0	0	0	0	0	0	0	0	0	0	0	0	0	0	0	0	0	0	0	0	0	0	0	0	0	0	0	0	0	0	0	0	0	0	0	0	0	0	0	0	0	0	0	0	0	0	0	0
0	0	0	0	0	0	0	0	0	0	0	0	0	0	0	0	0	0	0	0	0	0	0	0	0	0	0	0	0	0	0	0	0	0	0	0	0	0	0	0	0	0	0	0	0	0	0	0	0	0
0	0	0	0	0	0	0	0	0	0	0	0	0	0	0	0	0	0	0	0	0	0	0	0	0	0	0	0	0	0	0	0	0	0	0	0	0	0	0	0	0	0	0	0	0	0	0	0	0	0
0	0	0	0	0	0	0	0	0	0	0	0	0	0	0	0	0	0	0	0	0	0	0	0	0	0	0	0	0	0	0	0	0	0	0	0	0	0	0	0	0	0	0	0	0	0	0	0	0	0
0	0	0	0	0	0	0	0	0	0	0	0	0	0	0	0	0	0	0	0	0	0	0	0	0	0	0	0	0	0	0	0	0	0	0	0	0	0	0	0	0	0	0	0	0	0	0	0	0	0
0	0	0	0	0	0	0	0	0	0	0	0	0	0	0	0	0	0	0	0	0	0	0	0	0	0	0	0	0	0	0	0	0	0	0	0	0	0	0	0	0	0	0	0	0	0	0	0	0	0
0	0	0	0	0	0	0	0	0	0	0	0	0	0	0	0	0	0	0	0	0	0	0	0	0	0	0	0	0	0	0	0	0	0	0	0	0	0	0	0	0	0	0	0	0	0	0	0	0	0
0	0	0	0	0	0	0	0	0	0	0	0	0	0	0	0	0	0	0	0	0	0	0	0	0	0	0	0	0	0	0	0	0	0	0	0	0	0	0	0	0	0	0	0	0	0	0	0	0	0
[truncated: 78 more columns]
